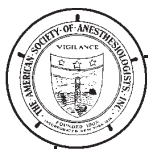

## ANNOUNCEMENT AND CALL FOR ABSTRACTS:

### ANNUAL JOURNAL SYMPOSIUM

The American Society of Anesthesiologists (ASA) and its journal *ANESTHESIOLOGY* announce the 16th annual "Journal Symposium," to be held at the Annual Meeting of the ASA in October 2007, in San Francisco, California. The Journal Symposium highlights emerging and important concepts in anesthesia research and clinical practice.

For 2007, the Journal Symposium is entitled "**Diabetes, Obesity, and the Metabolic Syndrome.**"

The Symposium will take place Tuesday, October 16, 2007, in San Francisco, California (exact time and location to be announced later).

The Symposium format will be a poster-discussion session in conjunction with formal lectures by four invited international experts. Abstracts for inclusion in the Journal Symposium will be chosen from among those submitted for presentation at the ASA's Annual Meeting. The selections will be made by the Symposium organizers, *ANESTHESIOLOGY* Editor Dr. Judy Kersten, of the Medical College of Wisconsin, Milwaukee, Wisconsin, and Dr. David O. Warner, of the Mayo Clinic, Rochester, Minnesota.

Investigators from around the world with an interest in this subject are encouraged to submit their work to the ASA for the Annual Meeting. Abstracts from both basic and clinical sciences are encouraged. Studies examining or evaluating the effects of the metabolic syndrome and its manifestations (*e.g.*, obesity, hypertension, and diabetes) on physiology and outcomes in surgical patients and the critically ill, including mechanistic, observational, epidemiologic, and interventional studies, are encouraged. Abstracts should be submitted *via* the usual online process (which can be accessed *via* the Web sites [www.ASAhq.org](http://www.ASAhq.org) and [www.anesthesiology.org](http://www.anesthesiology.org)). Interested individuals should be sure to check the Journal Symposium box on the abstract submission form to be considered for inclusion in this special session. The deadline for abstract submission is March 31, 2007.

The authors of abstracts selected for the Symposium will be offered an opportunity to submit their work to *ANESTHESIOLOGY* for inclusion in the special Symposium issue to be published in 2008.

## ANNOUNCEMENT AND CALL FOR ABSTRACTS:

### CRITICAL CARE

*ANESTHESIOLOGY*, in conjunction with the American Society of Critical Care Anesthesiologists (ASCCA), is pleased to announce a special session at the 2007 American Society of Anesthesiologists (ASA) Annual Meeting, October 13–17, 2007, in San Francisco, California.

This forum will serve two purposes. The first is to highlight new and innovative research in Critical Care Medicine. To this end, the session will feature (with posters) six oral presentations followed by brief discussions led by Brian P. Kavanagh, M.B., B.S.C., M.R.C.P., F.R.C.P., F.F.A.R.C.S. (HON), Professor and Chair, Department of Anesthesia, University of Toronto, Toronto, Ontario, Canada, and Clifford S. Deutschman, M.S., M.D., F.C.C.M., Professor of Anesthesiology, Critical Care and Surgery, University of Pennsylvania School of Medicine, Philadelphia, Pennsylvania.

Submissions from investigators involved in all types of research, including but not limited to basic science, clinical investigations, outcomes-based studies, epidemiology, and safety-oriented investigations, are suitable for consideration. A group from the ASA Subcommittee on Critical Care who are ASCCA members will select the posters for presentation at this session.

The second purpose is to provide a lecture on "Translational Research" by Dr. Clifford S. Deutschman. Together, these presentations will foster our goal of demonstrating the importance of Critical Care Medicine and its role in the practice of anesthesiology.

Abstracts should be submitted online to the ASA Annual Meeting using the standard online process (which can be accessed *via* the Web sites [www.ASAhq.org](http://www.ASAhq.org) and [www.anesthesiology.org](http://www.anesthesiology.org)). Select Critical Care as the major subject area to be considered for inclusion in this special session. In addition, authors should notify the *ANESTHESIOLOGY* Editorial Office *via* e-mail ([editorial-office@anesthesiology.org](mailto:editorial-office@anesthesiology.org)) regarding their interest in being considered for this session. The deadline for abstract submission is March 31, 2007. The authors of selected abstracts will also be offered an opportunity to submit their work to *ANESTHESIOLOGY* for inclusion in a special issue to be published in 2008.

## ANNOUNCEMENT AND CALL FOR ABSTRACTS:

### OBSTETRIC ANESTHESIA

*ANESTHESIOLOGY* and the Society for Obstetric Anesthesia and Perinatology (SOAP) are dedicated to bringing forward new and innovative research in the field of Obstetric Anesthesia. We are jointly organizing a special session during the ASA's Annual Meeting, October 13–17, 2007, in San Francisco, California.

This will be an oral presentation session (without posters). A committee consisting of Journal Editors and representatives of SOAP will select the abstracts and presenters for this session. The authors will be invited to prepare a formal 10-minute oral presentation of their work. After the oral presentation, experts will be invited to discuss each presentation. The aim of this session is to gather as many individuals as possible to participate in this session and to present the most current scientific papers.

Abstracts should be submitted online to the ASA Annual Meeting using the standard online process (which can be accessed *via* the Web sites [www.ASAhq.org](http://www.ASAhq.org) and [www.anesthesiology.org](http://www.anesthesiology.org)). Select Obstetric Anesthesia as the major subject area. In addition, authors should notify the *ANESTHESIOLOGY* Editorial Office *via* e-mail ([editorial-office@anesthesiology.org](mailto:editorial-office@anesthesiology.org)) regarding their interest in being considered for the specific session. The deadline for abstract submission is March 31, 2007. All selected authors will be invited to submit their work to *ANESTHESIOLOGY* for inclusion in a special issue to be published in 2008.
